# Supplementary material for: Dung Beetle Activity Is Soil-Type-Dependent and Modulates Pasture Growth and Associated Soil Microbiome
Source: MDPI journal article supplement (doi:10.3390/agronomy13020325), 2023-01-21
Supplement: s1 [file s1]

## Supplementary Material

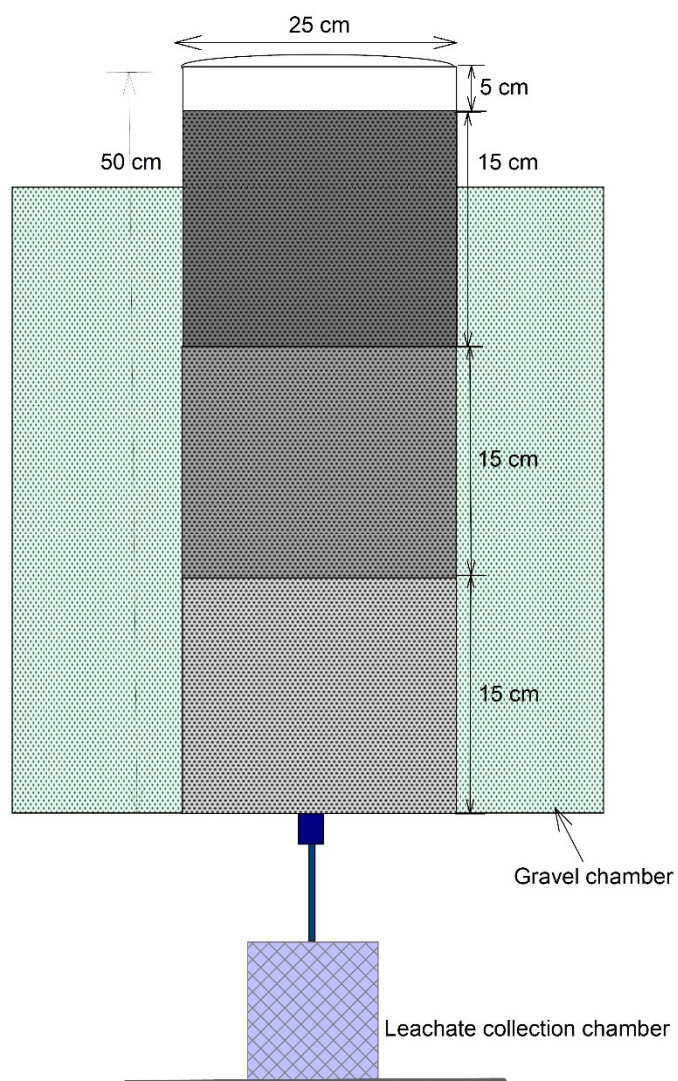

**Supplementary figure S1.** Schematic representation of the general assembly of a lysimeter column and leachate collection system, established in Wagga Wagga NSW.

A

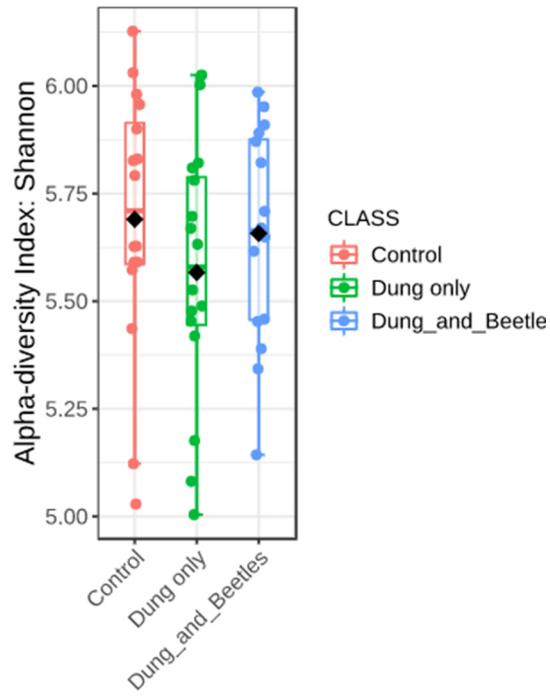

B

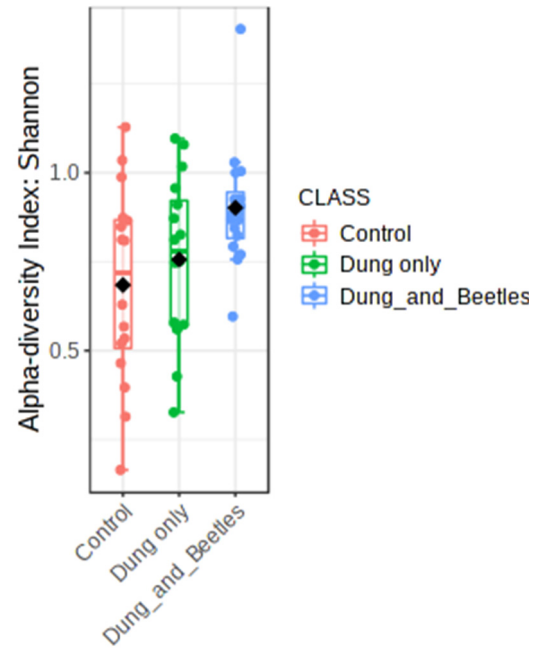

**Supplementary figure S2.** The impact of soil management strategies on the diversity of (A) bacterial and (B) fungal phyla.

**Supplementary table S1.** Monthly Climate Statistics for 'WAGGA WAGGA AMO' [072150], NSW, Australia.  
(Latitude: 35.16° South, Longitude:147.46° East, Elevation: 212 m) (Source:  
[http://www.bom.gov.au/climate/averages/tables/cw\\_072150.shtml](http://www.bom.gov.au/climate/averages/tables/cw_072150.shtml))

|                                                                        | May  | June | July | August | September | October | November | December | Annual |
|------------------------------------------------------------------------|------|------|------|--------|-----------|---------|----------|----------|--------|
| Mean maximum temperature (Degrees C) for years 1942 to 2022            | 17.4 | 13.9 | 12.8 | 14.5   | 17.7      | 21.7    | 25.9     | 29.6     | 22.2   |
| Mean minimum temperature (Degrees C) for years 1942 to 2022            | 5.9  | 3.7  | 2.8  | 3.5    | 5.1       | 7.8     | 11       | 13.9     | 9.1    |
| Mean daily ground minimum temperature Degrees C for years 1971 to 2016 | 3.1  | 1.2  | 0.2  | 0.7    | 2.3       | 4.7     | 8.1      | 10.8     | 6.2    |
| Mean rainfall (mm) for years 1941 to 2022                              | 50.7 | 50.7 | 53.5 | 51.1   | 49.2      | 55.7    | 48.1     | 45.7     | 571.4  |
| Mean number of days of rain for years 1941 to 2022                     | 9.2  | 11.4 | 13.6 | 13     | 10.5      | 9.2     | 7.7      | 6.3      | 104.2  |
| Mean daily sunshine (hours) for years 1986 to 2016                     | 6.3  | 4.6  | 4.8  | 6.4    | 7.6       | 9.2     | 9.7      | 10.4     | 8.1    |
| Mean daily evaporation (mm) for years 1966 to 2021                     | 2.1  | 1.3  | 1.2  | 1.9    | 3         | 5       | 7.2      | 9.4      | 5.1    |

**Supplementary table S2.** Nutrients in leachates collected from water percolating through four different soil types in lysimetry experimentation performed in Wagga Wagga, NSW during May – November 2021.

| Soil type | Treatment           | Replicate | NOx (mg/L) | TKN (mg/L) | Total P (mg/L) | NH <sub>4</sub> (mg/L) |
|-----------|---------------------|-----------|------------|------------|----------------|------------------------|
| Chromosol | Dung only           | 1         | 4.2        | 0.0        | 0.0            | 0.0                    |
| Chromosol | Dung only           | 2         | 0.0        | 0.0        | 0.0            | 0.0                    |
| Chromosol | Dung only           | 3         | 0.3        | 0.0        | 0.1            | 0.0                    |
| Chromosol | Dung only           | 4         | 0.2        | 0.0        | 0.0            | 0.0                    |
| Chromosol | Dung + Dung beetles | 1         | 1.7        | 0.0        | 0.0            | 0.0                    |
| Chromosol | Dung + Dung beetles | 2         | 0.2        | 0.0        | 0.0            | 0.0                    |
| Chromosol | Dung + Dung beetles | 3         | 3.0        | 0.0        | 0.0            | 0.0                    |
| Chromosol | Dung + Dung beetles | 4         | 0.6        | 0.0        | 0.0            | 0.0                    |
| Kandosol  | Dung only           | 1         | 0.0        | 0.0        | 0.0            | 0.0                    |
| Kandosol  | Dung only           | 2         | 0.0        | 0.0        | 0.0            | 0.0                    |
| Kandosol  | Dung only           | 3         | 0.0        | 0.0        | 0.0            | 0.0                    |
| Kandosol  | Dung only           | 4         | 1.5        | 0.0        | 0.2            | 0.0                    |
| Kandosol  | Dung + Dung beetles | 1         | 0.0        | 0.0        | 0.0            | 0.0                    |
| Kandosol  | Dung + Dung beetles | 2         | 0.1        | 0.0        | 0.0            | 0.0                    |
| Kandosol  | Dung + Dung beetles | 3         | 0.0        | 0.0        | 0.0            | 0.0                    |
| Kandosol  | Dung + Dung beetles | 4         | 0.0        | 0.0        | 0.0            | 0.0                    |
| Rudosol   | Dung only           | 1         | 2.4        | 0.0        | 0.0            | 0.0                    |
| Rudosol   | Dung only           | 2         | 19.5       | 0.0        | 0.1            | 0.0                    |
| Rudosol   | Dung only           | 3         | 21.2       | 0.0        | 0.1            | 0.0                    |
| Rudosol   | Dung only           | 4         | 10.6       | 0.0        | 0.1            | 0.0                    |
| Rudosol   | Dung + Dung beetles | 1         | 13.5       | 0.0        | 0.0            | 0.0                    |
| Rudosol   | Dung + Dung beetles | 2         | 20.9       | 0.0        | 0.0            | 0.0                    |
| Rudosol   | Dung + Dung beetles | 3         | 11.6       | 0.0        | 0.0            | 0.0                    |
| Rudosol   | Dung + Dung beetles | 4         | 20.1       | 0.0        | 0.1            | 0.0                    |
| Vertosol  | Dung only           | 1         | 23.0       | 0.0        | 0.0            | 0.0                    |
| Vertosol  | Dung only           | 2         | 22.4       | 0.0        | 0.0            | 0.0                    |
| Vertosol  | Dung only           | 3         | 22.7       | 0.0        | 0.0            | 0.0                    |
| Vertosol  | Dung only           | 4         | 0.0        | 0.0        | 0.0            | 0.0                    |
| Vertosol  | Dung + Dung beetles | 1         | 2.8        | 0.0        | 0.0            | 0.0                    |
| Vertosol  | Dung + Dung beetles | 3         | 22.8       | 0.0        | 0.0            | 0.0                    |
| Vertosol  | Dung + Dung beetles | 4         | 22.5       | 0.0        | 0.0            | 0.0                    |
| Vertosol  | Dung + Dung beetles | 2         | 16         | 0.0        | 0.0            | 0.0                    |
